# Supplementary material for: Serum Insulin-Like Growth Factor 1 Levels, Facture Risk Assessment Tool Scores and Bone Disorders in Patients with Primary Biliary Cholangitis
Source: MDPI journal article supplement (doi:10.3390/diagnostics12081957), 2022-08-12
Supplement: s1 [file s1]

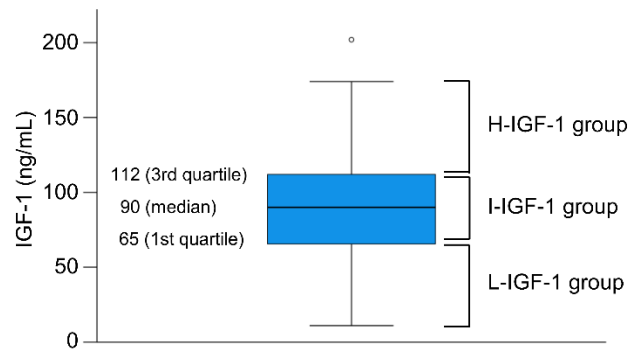

**Figure S1.** Classification according to baseline serum insulin-like growth factor 1 (IGF-1) levels. The median (interquartile range) serum IGF-1 level was 90 (65–112) ng/mL. According to the IGF-1 levels in the first and third quartiles, the 127 patients were classified into the three groups: the low-IGF-1 (L-IGF-1) group (<65 ng/mL), intermediate-IGF-1 (I-IGF-1) group (between 65 and 112 ng/mL), and high-IGF-1 (H-IGF-1) group (>112 ng/mL).

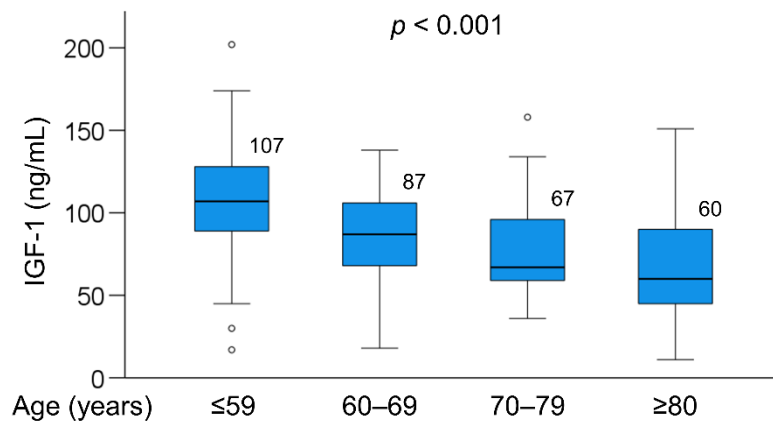

**Figure S2.** Comparison of serum insulin-like growth factor 1 (IGF-1) levels among the four age groups. The serum IGF-1 levels significantly decreased stepwise with advancing age. The numbers on the upper right corner of each box indicate the median values in each group.

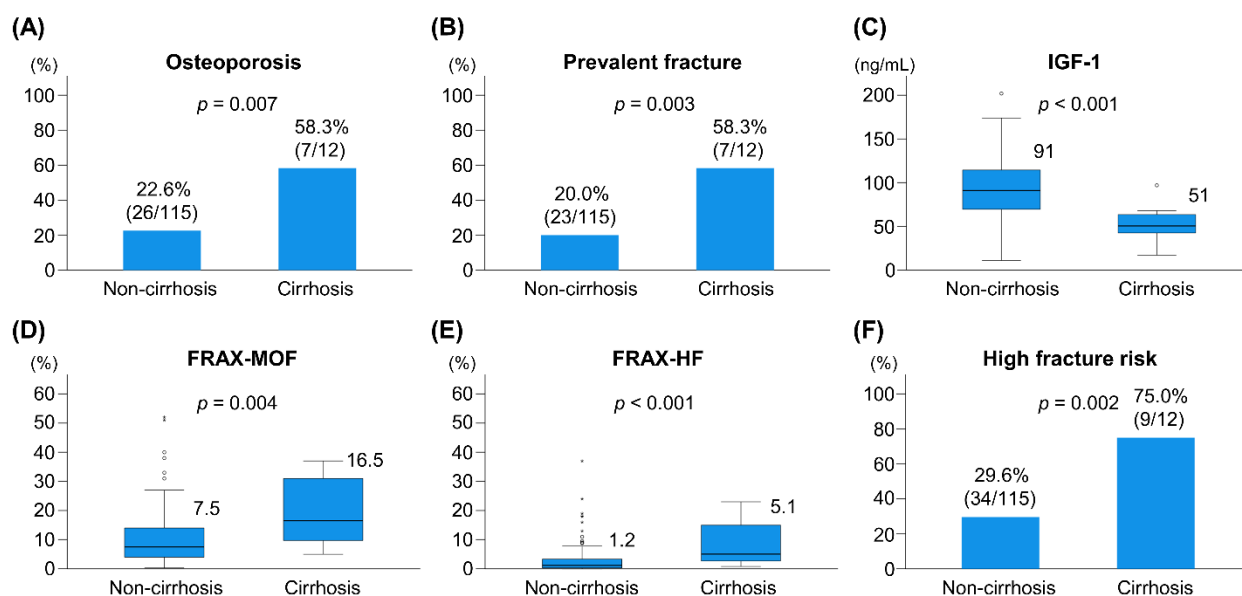

**Figure S3.** Clinical characteristics of patients with cirrhosis and non-cirrhosis. **(A,B)** The cirrhosis group had significantly higher prevalence of osteoporosis and prevalent fracture than the non-cirrhosis group. **(C)** The cirrhosis group had significantly lower serum insulin-like growth factor 1 (IGF-1) levels than the non-cirrhosis group. The numbers on the upper right corner of each box indicate the median values in each group. **(D,E)** The cirrhosis group had significantly higher 10-year probabilities of major osteoporotic fracture (FRAX-MOF) and hip fracture (FRAX-HF) than the non-cirrhosis group. The numbers on the upper right corner of each box indicate the median percentages in each group. **(F)** The cirrhosis group had significantly higher prevalence of high fracture risk than the non-cirrhosis group. FRAX, Fracture Risk Assessment Tool.
